# Supplementary material for: Accurate Bulk Quantitation of Droplet Digital Polymerase Chain Reaction
Source: PubMed Central journal article supplement — Anal Chem. 2021 Jul 12;93(29):9974–9. doi: 10.1021/acs.analchem.1c00877 (PMC8829825; doi:10.1021/acs.analchem.1c00877), 2021-07-12
Supplement: ac1c00877_si_001.pdf [file ac1c00877_si_001.pdf]

## Supplementary Information

### Accurate bulk quantitation of droplet digital PCR

Chen Sun<sup>1</sup>, Leqian Liu<sup>1</sup>, Harish N. Vasudevan<sup>1,2</sup>, Kai-Chun Chang<sup>1</sup> and Adam R. Abate<sup>1,3,4\*</sup>

<sup>1</sup> Department of Bioengineering and Therapeutic Sciences, University of California San Francisco, San Francisco, CA 94158, USA

<sup>2</sup> Department of Radiation Oncology, University of California San Francisco, San Francisco, CA 94158, USA

<sup>3</sup> California Institute for Quantitative Biosciences, University of California San Francisco, San Francisco, CA 94158, USA

<sup>4</sup> Chan Zuckerberg Biohub, San Francisco, CA 94158, USA

\* Corresponding author: [adam@abatelab.org](mailto:adam@abatelab.org)

### Table of Contents

1. Methods for microfluidic ddPCR using commercial droplet generator
2. Figure S1 Images showing quantification of ddPCR amplicons of two molecular lengths by on-chip electrophoresis.

## Methods

Microfluidic ddPCR by commercial droplet generator and droplet reader  
QX200 droplet generator (Bio-Rad, #1864002) was used to make emulsions following the manufacture's instruction. Briefly, 20  $\mu$ L reaction mix was prepared using ddPCR Supermix for Probe (no dUTP) (Bio-Rad, #1863024), 0.5  $\mu$ M N2 outer primers (F: AAC ACA AGC TTT CGG CAG AC, R:CCC GAA GGT GTG ACT TCC AT) and template (2019-nCoV\_N\_Positive Control, Integrated DNA Technologies, #10006625). The ddPCR reaction mix was added to the droplet generator and converted to droplets with the use of Droplet Generation Oil for Probes (Bio-Rad, #1863005) and DG8 Cartridges and Gaskets (Bio-Rad, # 1864007). Emulsified samples were transferred to PCR tubes and thermocycled in a Thermal Cycler (Bio-Rad, T100). Thermal cycling was performed at: 10 min at 95  $^{\circ}$ C; 45 cycles of 20 s at 95  $^{\circ}$ C, 30 s at 55  $^{\circ}$ C and 30 s at 72  $^{\circ}$ C. The droplets were screened by a QX200 droplet reader (Bio-Rad, #1864003) to quantify PCR positive drops.

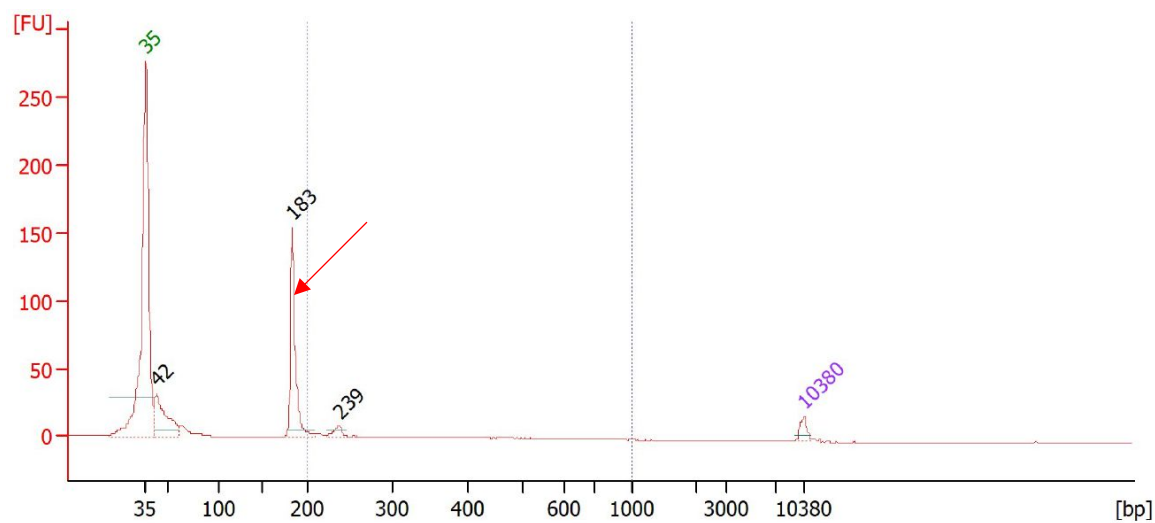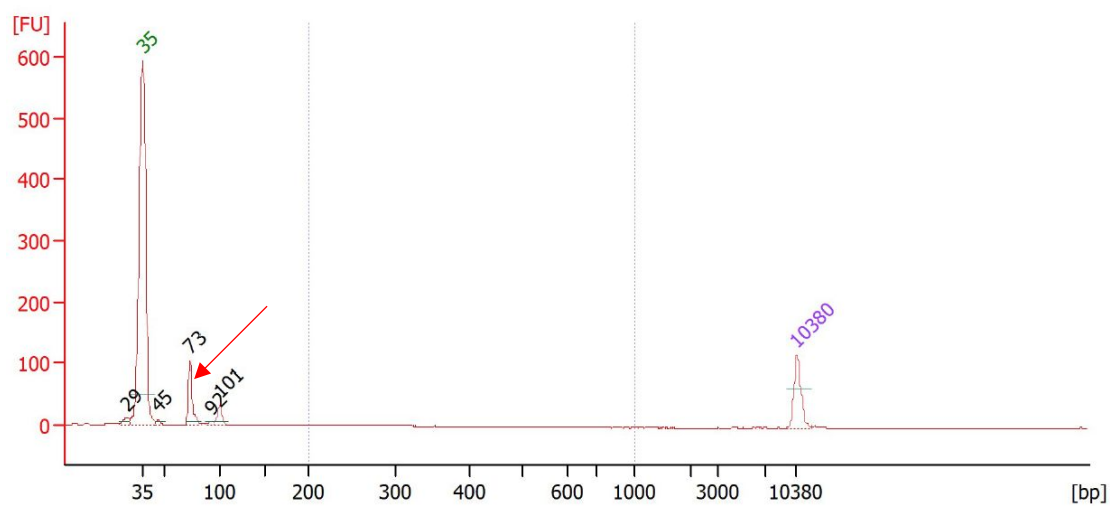

**Figure S1** Quantification the ddPCR amplicons using on-chip electrophoresis. Peak representing the correct molecular length using (a) N2 outer primers and (b) N2 primers is detected (indicated by the arrows).
